# Supplementary material for: Clinical significance of PD-L1 and PD-L2 copy number gains in non-small-cell lung cancer
Source: PubMed Central journal article supplement (PMC5078001; doi:10.18632/oncotarget.8528), 2016-04-01
Supplement: oncotarget-07-32113-s001.pdf [file oncotarget-07-32113-s001.pdf]

## Clinical significance of *PD-L1* and *PD-L2* copy number gains in non-small-cell lung cancer

### Supplementary Materials

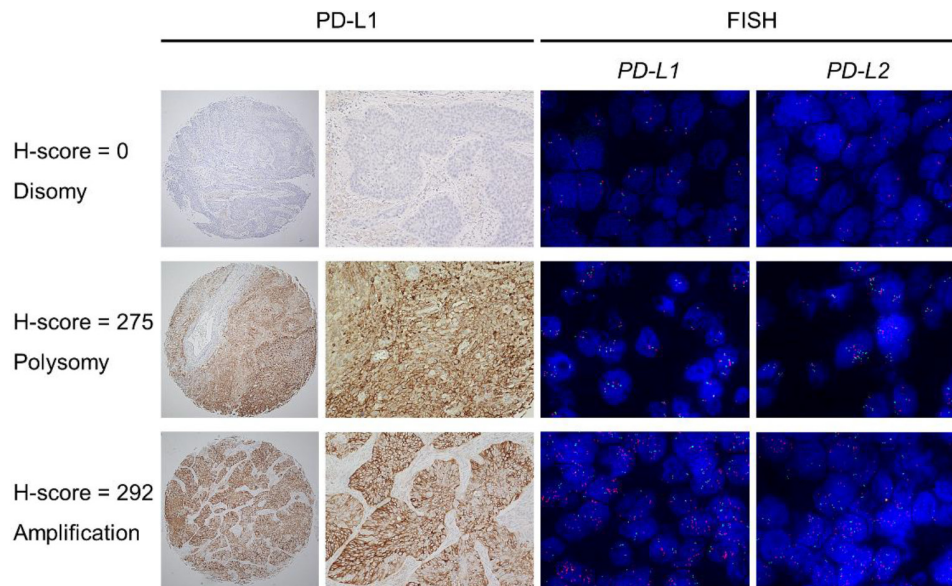

**Supplementary Figure S1: Representative images of immunohistochemistry analysis of *PD-L1* and fluorescence *in situ* hybridization (FISH) analyses of *PD-L1* and *PD-L2*.** The upper case shows no *PD-L1* expression and normal copy numbers of the *PD-L1* and *PD-L2* genes. The middle case shows strong *PD-L1* expression (H-score = 275) and polysomy of both the *PD-L1* and *PD-L2* genes. The lower case shows images of strong *PD-L1* expression (H-score = 292) and amplified-*PD-L1* and -*PD-L2*. The left-side and right-side immunohistochemistry photomicrographs are the original magnification of  $\times 4$  and  $\times 20$ , respectively. The FISH images are the original magnification of  $\times 100$ .

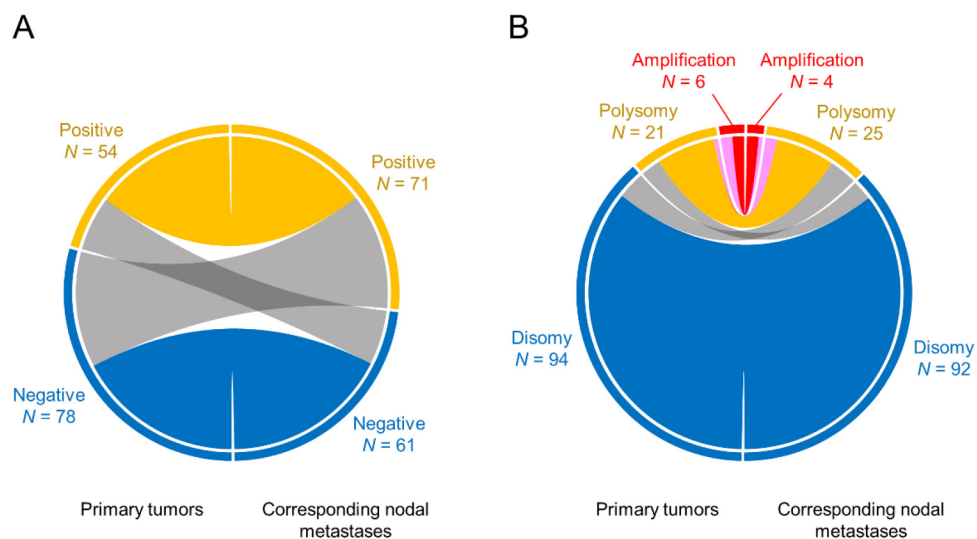

**Supplementary Figure S2: Chord diagrams summarizing the agreement and disagreement of *PD-L1* statuses between primary tumors and matched metastatic regional lymph nodes.** Primary tumors are depicted in the left side, and lymph node metastases are depicted in the right side of each chord diagram. The agreement of *PD-L1* expression positivity is shown on the left side of the chord diagram (A), and that of *PD-L1* copy number status is shown on the right side (B). The blue, yellow, and red colored areas represent concordance, and gray and pink colored areas represent discordance.

**Supplementary Table S1: Clinicopathological characteristics of patients with non-small-cell lung cancer related to PD-L2 expression and *PD-L2* copy number status. See Supplementary\_Table\_S1**

**Supplementary Table S2: Agreement for copy number alterations divided into five groups between the *PD-L1* and *PD-L2* genes**

| <i>PD-L1</i> copy number | <i>PD-L2</i> copy number |                     |              |               |               | Total |
|--------------------------|--------------------------|---------------------|--------------|---------------|---------------|-------|
|                          | Disomy                   | Borderline polysomy | Low polysomy | High polysomy | Amplification |       |
| Disomy                   | 502 (96.7%)              | 4 (19.0%)           | 3 (7.5%)     | 0             | 0             | 509   |
| Borderline polysomy      | 9 (1.7%)                 | 9 (42.9%)           | 0            | 0             | 0             | 18    |
| Low polysomy             | 6 (1.2%)                 | 7 (33.3%)           | 22 (55.0%)   | 3 (8.1%)      | 1 (9.1%)      | 39    |
| High polysomy            | 1 (0.2%)                 | 1 (4.8%)            | 13 (32.5%)   | 28 (75.7%)    | 0             | 43    |
| Amplification            | 1 (0.2%)                 | 0                   | 2 (5.0%)     | 6 (16.2%)     | 10 (90.9%)    | 19    |
| Total                    | 519                      | 21                  | 40           | 37            | 11            | 628   |

Weighted kappa coefficient of agreement = 0.91 (95% confidence interval, 0.87–0.94).

**Supplementary Table S3: Agreement for copy number alterations divided into five groups between the *PD-L1* and *JAK2* genes**

| <i>PD-L1</i> copy number | <i>JAK2</i> copy number |                     |              |               |               | Total |
|--------------------------|-------------------------|---------------------|--------------|---------------|---------------|-------|
|                          | Disomy                  | Borderline polysomy | Low polysomy | High polysomy | Amplification |       |
| Disomy                   | 474 (95.8%)             | 23 (62.2%)          | 6 (14.0%)    | 2 (5.9%)      | 0             | 505   |
| Borderline polysomy      | 11 (2.2%)               | 7 (18.9%)           | 0            | 0             | 0             | 18    |
| Low polysomy             | 8 (1.6%)                | 5 (13.5%)           | 21 (48.8%)   | 5 (14.7%)     | 1 (6.25%)     | 40    |
| High polysomy            | 2 (0.4%)                | 2 (5.4%)            | 14 (32.6%)   | 24 (70.6%)    | 1 (6.25%)     | 43    |
| Amplification            | 0                       | 0                   | 2 (4.6%)     | 3 (8.8%)      | 14 (87.5%)    | 19    |
| Total                    | 495                     | 37                  | 43           | 34            | 16            | 625   |

Weighted kappa coefficient of agreement = 0.87 (95% confidence interval, 0.83–0.91).

**Supplementary Table S4: Clinicopathological characteristics of patients with non-small-cell lung cancer tested for *EGFR* mutations related to PD-L1 expression and *PD-L1* copy number status. See Supplementary\_Table\_S4**
